# Supplementary material for: Nioplexes encapsulated in supramolecular hybrid biohydrogels as versatile delivery platforms for nucleic acids
Source: Royal Society of Chemistry journal article supplement (doi:10.1039/c6ra01005a), 2016-01-01
Supplement: c6ra01005a1.pdf [file c6ra01005a1.pdf]

## ***Supporting Information***

### **Nioplexes Encapsulated in Supramolecular Hybrid Biohydrogels as Versatile Delivery Platforms for Nucleic Acids**

Santiago Grijalvo,<sup>a,b,c</sup> Gustavo Puras,<sup>c,d</sup> Jon Zárata,<sup>c,d</sup> Ramon Pons,<sup>b</sup> Jose Luis Pedraz,<sup>c,d</sup> Ramon Eritja<sup>b,c</sup> and David Díaz Díaz<sup>a,b,\*</sup>

<sup>a</sup> Institute of Organic Chemistry, University of Regensburg, Universitätstrasse. 31, D-93040 Regensburg (Germany). E-mail: David.Diaz@chemie.uni-regensburg.de. Tel. +(0) 941 943-4373; Fax: +(0) 941 943-4121. <sup>b</sup> Institute of Advanced Chemistry of Catalonia (IQAC-CSIC). <sup>c</sup> Biomedical Research Networking Center in Bioengineering, Biomaterials and Nanomedicine (CIBER BBN). <sup>d</sup> NanoBioCel group. University of the Basque Country (EHU-UPV)

**CONTENTS**

|                                                                                                                              | <i>Page</i> |
|------------------------------------------------------------------------------------------------------------------------------|-------------|
| <sup>1</sup> H-NMR of <i>lipid-1</i> .....                                                                                   | S3          |
| Digital pictures of representative hydrogels .....                                                                           | S3          |
| Encapsulation efficiencies (EE) of hydrogels .....                                                                           | S4          |
| DSS measurements and critical strain ( $\gamma_c$ ) .....                                                                    | S4          |
| DTS measurements .....                                                                                                       | S5          |
| Standard curve for FITC-ODN .....                                                                                            | S5          |
| Drug release models according to Higuchi equation .....                                                                      | S6          |
| Drug release models according to Korsmeyer-Peppas equation .....                                                             | S6          |
| Drug release models according to Weibull equation .....                                                                      | S6          |
| Combination of the three FITC-ODN cumulative release from <i>hydrogels-(2-4)</i> .....                                       | S7          |
| Native polyacrylamide electrophoresis (PAGE) gels containing cationic nioplexes ....                                         | S8          |
| Release profiles of niosomal FITC-ODN from <i>hydrogels-(1-4)</i> as a function of log cumulative release vs. log time ..... | S9          |
| Cell morphology images .....                                                                                                 | S9          |

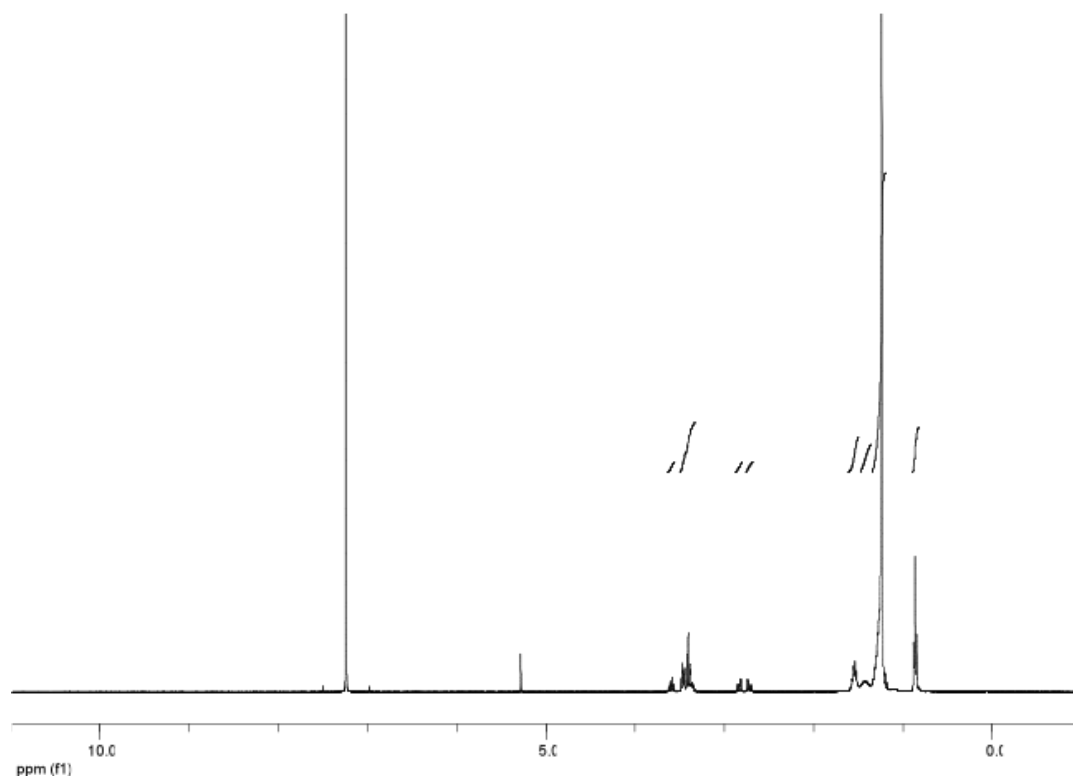

**Figure S1.**  $^1\text{H-NMR}$  of *lipid-1*. Reaction was performed under argon atmosphere.  $^1\text{H-NMR}$  spectra was recorded in  $\text{CDCl}_3$  at  $25\text{ }^\circ\text{C}$  on a Varian Mercury 400 MHz spectrometer. The proton signal for residual non-deuterated solvent ( $\delta$  7.26) was used as an internal referente. Chemical shifts are reported in parts per million (ppm), coupling constants ( $J$ ) in Hz and multiplicity as follows: t (triplet), dd (doublet of doublets), m (multiplet):  $^1\text{H-NMR}$  (400 MHz,  $\text{CDCl}_3$ )  $\delta$  (ppm) 3.59 (m, 1H;  $\text{CH-O}$ ), 3.46 (m, 2H;  $\text{CH}_2\text{-O}$ ), 3.40 (m, 4H; 2  $\text{CH}_2\text{-O}$ ), 2.83 (dd,  $J = 13.4\text{ Hz}$ ,  $3.9\text{ Hz}$ ; 1H;  $\text{CH-N}$ ), 2.71 (dd,  $J = 13.2\text{ Hz}$ ,  $4.0\text{ Hz}$ ; 1H;  $\text{CH-N}$ ), 1.53 (m, 4H; 2  $\text{CH}_2\text{-C}$ ), 1.23 (m, 40 H; alkyl chain), 0.86 (t,  $J = 7.0\text{ Hz}$ , 6H; 2  $\text{CH}_3\text{-CH}_2$ ).

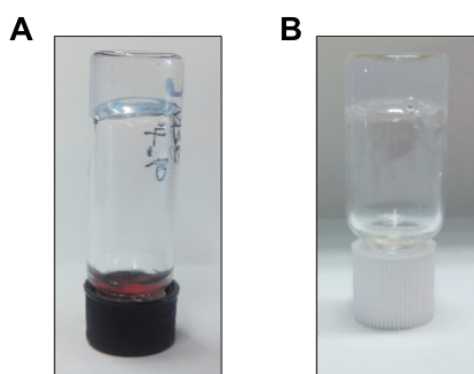

**Figure S2.** Supramolecular hydrogel picture selections. (A) *N*-Fmoc-protected amino acid (Fmoc-Phe-OH) containing cationic niosomes (*hydrogel-1*). (B) *N*-Fmoc-protected amino acid (Fmoc-Phe-OH) crosslinked with  $\kappa$ -carrageenan (1%, w/v) (*hydrogel-4*).

**Table S1** Encapsulation efficiencies (EE) of *hydrogels-(1-4)*. Native hydrogels (*hydrogel-5* and *hydrogel-6*) were used as controls for comparison purposes.<sup>a</sup>

| Entry | Sample            | $\kappa$ -C<br>(%, w/v) | Cationic<br>niosomes:<br>FITC-ODN | EE<br>(%) | $G'$<br>(kPa) | $G''$<br>(kPa) | $\gamma$<br>(%) | $\gamma_c$<br>(%) | $\tan \delta$ |
|-------|-------------------|-------------------------|-----------------------------------|-----------|---------------|----------------|-----------------|-------------------|---------------|
| 1     | <i>Hydrogel-1</i> | -                       | yes                               | 94.0±1.5  | 2.68          | 0.40           | -               | 16.6              | 0.15          |
| 2     | <i>Hydrogel-2</i> | 0.5                     | yes                               | 97.0±0.5  | nd            | nd             | nd              | nd                | nd            |
| 3     | <i>Hydrogel-3</i> | 0.8                     | yes                               | 98.0±0.4  | nd            | nd             | nd              | nd                | nd            |
| 4     | <i>Hydrogel-4</i> | 1                       | yes                               | 98.0±0.8  | 5.29          | 0.57           | 87              | 20.0              | 0.10          |
| 5     | <i>Hydrogel-5</i> | -                       | native                            | -         | 2.38          | 0.33           | 43              | 13.0              | 0.14          |
| 6     | <i>Hydrogel-6</i> | 1                       | native                            | -         | 7.81          | 0.72           | 68              | 13.4              | 0.09          |

<sup>a</sup> Abbreviations and definitions:  $\kappa$ -C =  $\kappa$ -carrageenan;  $G'$  = storage modulus;  $G''$  = loss modulus;  $\gamma$  = strain at break (yield stress);  $\gamma_c$  = critical strain;  $\tan \delta$  = loss factor ( $G''/G'$ ); nd = not determined. Reported data are means of three independent experiments  $\pm$  S.D.

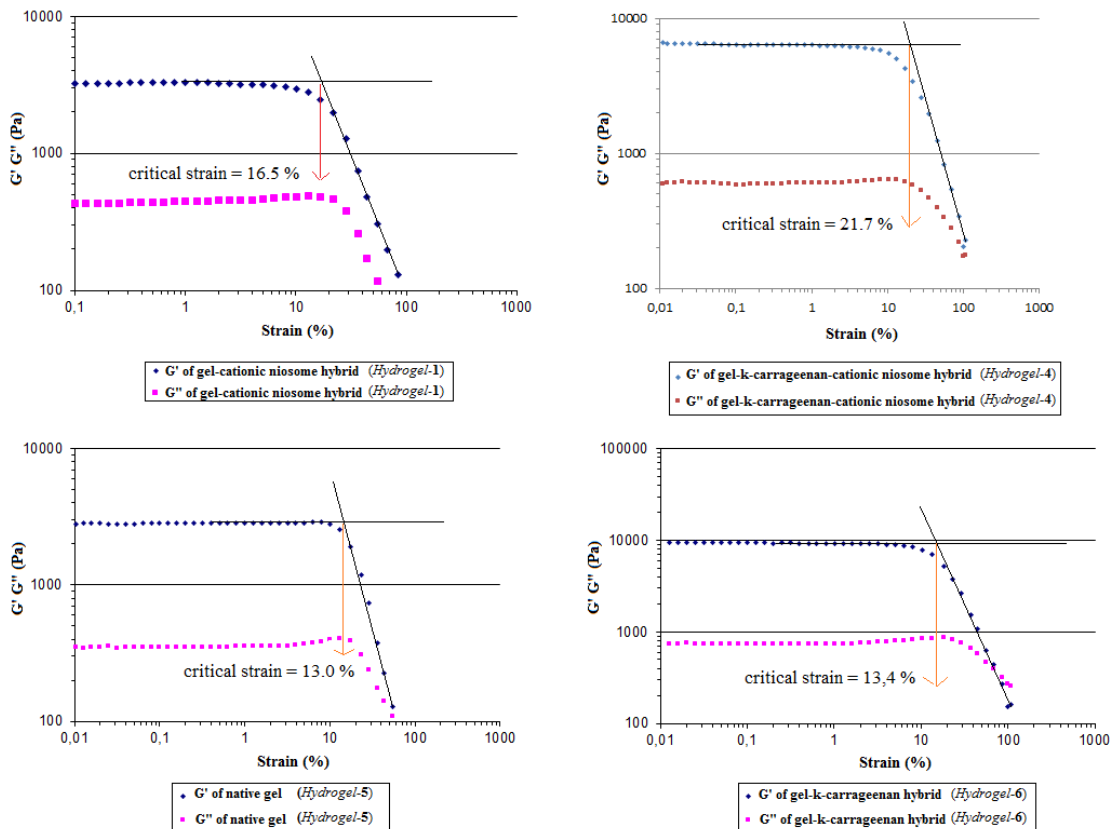**Figure S3.** DSS measurements and critical strain ( $\gamma_c$ ).

A

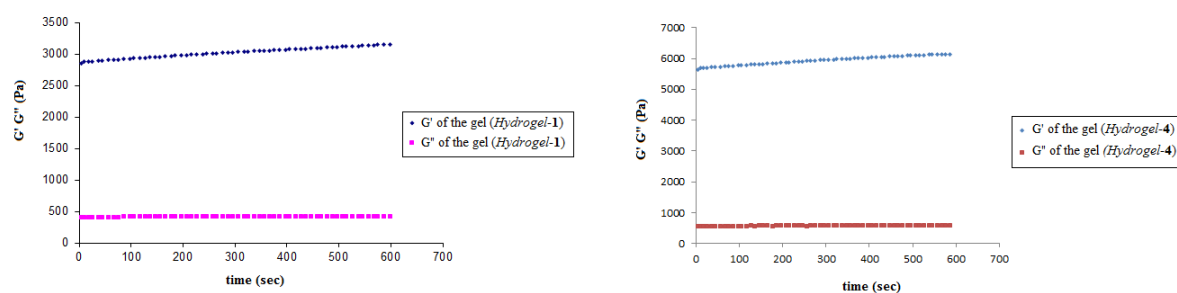

B

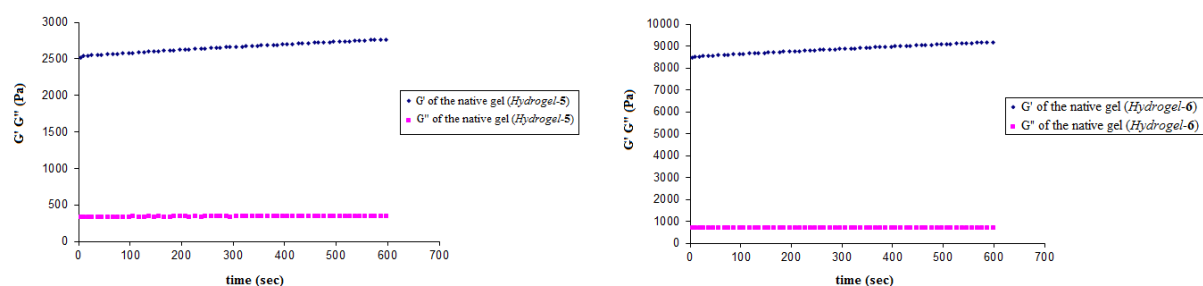

**Figure S4.** DTS measurements of *hydrogel-1*, *hydrogel-4*, *hydrogel-5* and *hydrogel-6*. (A) *Left*: Hydrogel containing cationic niosomes (*hydrogel-1*). *Right*: hydrogel crosslinked with  $\kappa$ -carrageenan (1%, w/v) and containing cationic niosomes (*hydrogel-4*). (B) *Left*: Native hydrogel (without cationic niosomes and  $\kappa$ -carrageenan; *hydrogel-5*). *Right*: Native hydrogel (without cationic niosomes but containing  $\kappa$ -carrageenan; *hydrogel-6*).

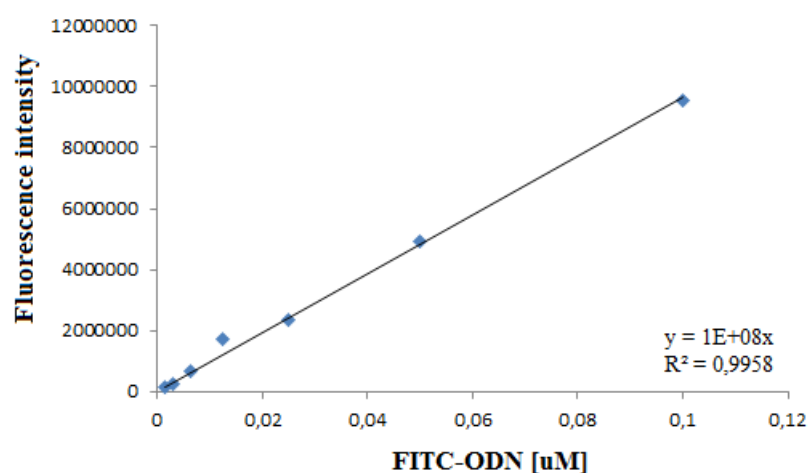

**Figure S5.** Standard curve of FITC-ODN.

**Table S2.** Model release parameters for *hydrogels-(1-4)* according to Higuchi equation

$$\frac{M_t}{M_\infty} = k * \sqrt{t}$$

| Entry | Sample            | <i>k</i> | <i>r</i> <sup>2</sup> |
|-------|-------------------|----------|-----------------------|
| 1     | <i>Hydrogel-1</i> | 9.74     | 0.9891                |
| 2     | <i>Hydrogel-2</i> | 6.90     | 0.9717                |
| 3     | <i>Hydrogel-3</i> | 5.73     | 0.9765                |
| 4     | <i>Hydrogel-4</i> | 5.12     | 0.9947                |

**Table S3.** Model release parameters for *hydrogels-(1-4)* according to Korsmeyer-Peppas' equation. The model was calculated for the first 60% of the FITC-ODN release

$$\frac{M_t}{M_\infty} = k * t^n$$

| Entry | Sample            | <i>k</i> | <i>n</i> | <i>r</i> <sup>2</sup> |
|-------|-------------------|----------|----------|-----------------------|
| 1     | <i>Hydrogel-1</i> | 7.63     | 0.56     | 0.9935                |
| 2     | <i>Hydrogel-2</i> | 6.04     | 0.52     | 0.9940                |
| 3     | <i>Hydrogel-3</i> | 5.38     | 0.51     | 0.9938                |
| 4     | <i>Hydrogel-4</i> | 5.12     | 0.52     | 0.9952                |

**Table S4.** Model release parameters for *hydrogels-(1-4)* according to Weibull equation

$$\frac{M_t}{M_\infty} = a * (1 - \exp(-(kt)^b))$$

| Entry | Sample            | <i>a</i> | <i>k</i> | <i>b</i> | <i>r</i> <sup>2</sup> |
|-------|-------------------|----------|----------|----------|-----------------------|
| 1     | <i>Hydrogel-1</i> | 137.8    | 0.013    | 0.77     | 0.9803                |
| 2     | <i>Hydrogel-2</i> | 98.9     | 0.013    | 0.96     | 0.9647                |
| 3     | <i>Hydrogel-3</i> | 94.5     | 0.011    | 0.93     | 0.9834                |
| 4     | <i>Hydrogel-4</i> | 129.7    | 0.005    | 0.73     | 0.9949                |

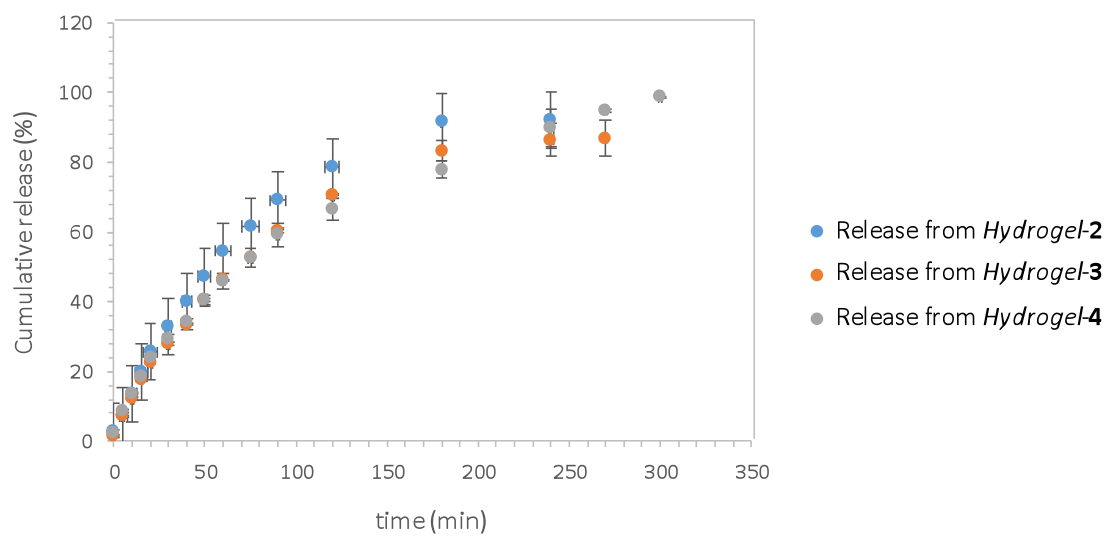

**Figure S6.** Combination of the three niosomal FITC-ODN cumulative release from *hydrogels*-**(2-4)**.

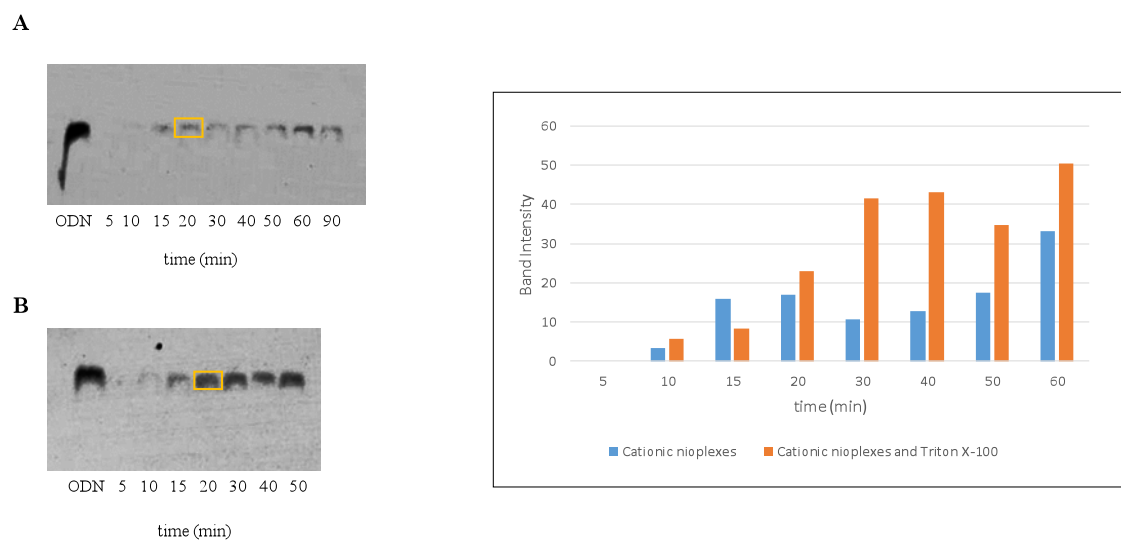

**Figure S7.** A. FITC-ODN release from *hydrogel-3* containing cationic nioplexes analyzed by native gel polyacrylamide electrophoresis (PAGE). B. FITC-ODN release from *hydrogel-3* containing cationic nioplexes analyzed by native gel polyacrylamide electrophoresis. 100 mM Triton X-100 was added to the PBS receptor phase at different times. The solubilization of the niosomes produced a liberation of the unformulated FITC-ODN.



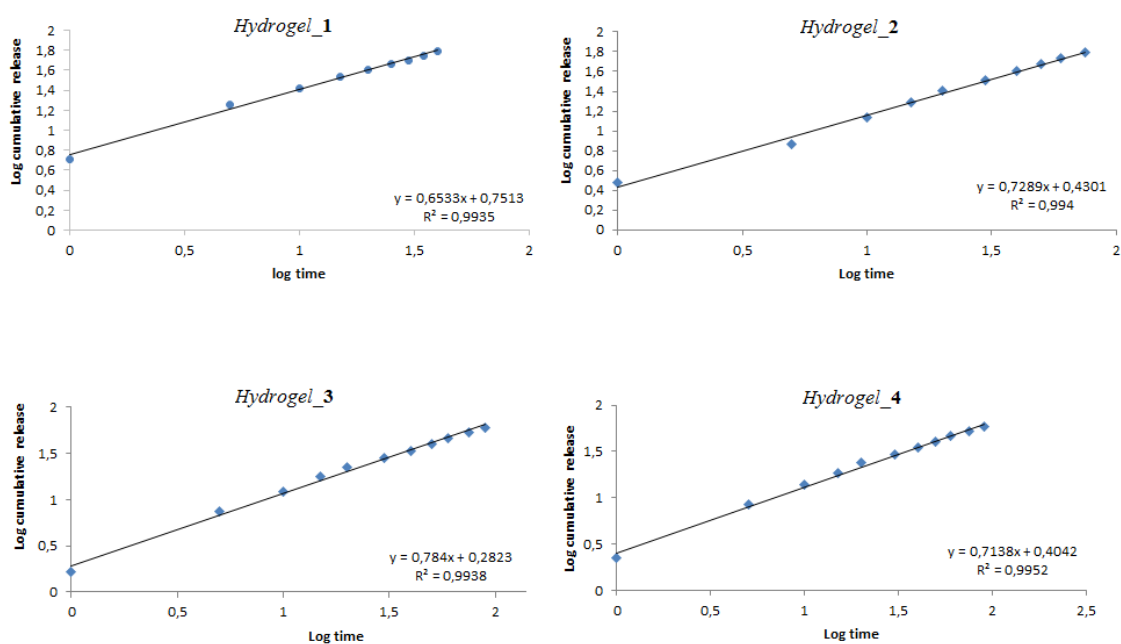

**Figure S8.** Release profiles of niosomal FITC-ODN from *hydrogels*-(1-4).

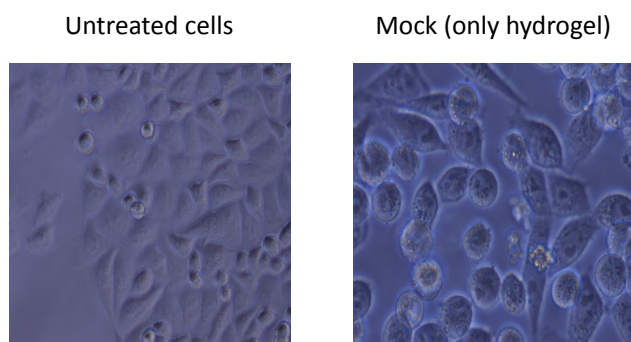

**Figure S9.** Cell morphology images of HeLa cells in the absence (*left*) and the presence of *hydrogel-3* (*mock*) (*right*).
